# Supplementary material
Source: PubMed Central journal article supplement (PMC4649179)
Supplement: AAC.01291-15_zac012154649so1.pdf [file AAC.01291-15_zac012154649so1.pdf]

**Supplementary Table 1.** Primer sequences for PCR used in this study.

| Locus      | Forward/Reverse | Sequence (5'-3')      |
|------------|-----------------|-----------------------|
| Junction 1 | F               | CAAACGCGCTGATTGCCATTC |
| Junction 1 | R               | CCCGCTTTGCCACGGACATA  |
| Junction 2 | F               | CCCGCTTTGCCACGGACATA  |
| Junction 2 | R               | CGGTGCGCGACAACCTACG   |
| Junction 3 | F               | GTACGCCACCCGACCTGGAC  |
| Junction 3 | R               | AAACGCGCTGATTGCCATTCT |

**Supplementary Table 2.** Genes under positive selection in the circulating CP-*E. cloacae* lineage.

| <b>groupid</b> | <b>dN/dS</b> | <b>dN</b> | <b>dS</b> | <b>Description</b>                            |
|----------------|--------------|-----------|-----------|-----------------------------------------------|
| group2056      | 306.9865     | 0.0359    | 0.0001    | phospholipid:lipid A palmitoyltransferase     |
| group5         | 188.0339     | 0.0101    | 0.0001    | Hcp1 family type VI secretion system effector |
| group2142      | 8.0817       | 0.0301    | 0.0037    | hypothetical protein                          |
| group640       | 4.5993       | 0.0102    | 0.0022    | 2'-5' RNA ligase                              |
| group1014      | 3.431        | 0.2088    | 0.0609    | hypothetical protein                          |
| group1368      | 3.0634       | 0.0582    | 0.019     | hypothetical protein                          |
| group2242      | 2.4204       | 0.0261    | 0.0108    | polysaccharide export protein Wza             |
| group168       | 2.1798       | 0.2044    | 0.0938    | hypothetical protein                          |
| group3792      | 2.0738       | 0.0907    | 0.0437    | antirepressor                                 |
| group2648      | 2.0251       | 0.0128    | 0.0063    | hydrogenase assembly chaperone                |
| group2695      | 1.6815       | 0.0294    | 0.0175    | hypothetical protein                          |
| group3671      | 1.6249       | 0.1056    | 0.065     | hypothetical protein                          |
| group2417      | 1.5371       | 0.1378    | 0.0897    | hypothetical protein                          |
| group3870      | 1.508        | 0.1786    | 0.1185    | membrane protein                              |
| group527       | 1.2409       | 0.1138    | 0.0917    | hypothetical protein                          |
| group785       | 1.1834       | 0.2276    | 0.1923    | hypothetical protein                          |
| group730       | 1.1802       | 0.0208    | 0.0176    | transcriptional regulator                     |
| group2241      | 1.127        | 0.0115    | 0.0102    | phosphotyrosine-protein phosphatase           |
| group2753      | 1.05         | 0.0132    | 0.0126    | hypothetical protein                          |
| group3696      | 1.045        | 0.0138    | 0.0132    | ATPase                                        |
| group1709      | 1.014        | 0.0121    | 0.0119    | hypothetical protein                          |
| group3668      | 1.0079       | 0.0313    | 0.031     | transposase                                   |

**Supplementary Table 3.** Comparison of single nucleotide polymorphisms effects within the *E. cloacae* circulating lineage.

| Strain  | Synonymous | Non-synonymous | Total SNPs | Insertions | Deletions |
|---------|------------|----------------|------------|------------|-----------|
| MNCRE56 | 1          | 8              | 14         | 3          | 2         |
| MNCRE79 | 1          | 10             | 17         | 3          | 3         |
| MNCRE81 | 1          | 5              | 10         | 0          | 1         |
| MNCRE28 | 1          | 7              | 13         | 3          | 1         |
| MNCRE25 | 1          | 7              | 14         | 3          | 1         |
| MNCRE23 | 1          | 7              | 13         | 2          | 1         |
| MNCRE39 | 3          | 8              | 17         | 0          | 1         |
| MNCRE51 | 3          | 6              | 14         | 3          | 1         |
| MNCRE37 | 2          | 7              | 13         | 0          | 2         |
| MNCRE41 | 5          | 7              | 27         | 4          | 1         |
| MNCRE42 | 3          | 7              | 24         | 5          | 1         |
| MNCRE36 | 1          | 7              | 13         | 3          | 1         |
| MNCRE85 | 1          | 7              | 13         | 3          | 2         |
| MNCRE83 | 2          | 9              | 16         | 0          | 1         |
| MNCRE86 | 2          | 11             | 18         | 3          | 1         |
| MNCRE84 | 2          | 7              | 13         | 0          | 2         |
| MNCRE17 | 6          | 12             | 21         | 2          | 1         |
| MNCRE08 | 3          | 6              | 12         | 1          | 1         |
| MNCRE18 | 5          | 11             | 21         | 1          | 1         |
| MNCRE06 | 3          | 9              | 16         | 1          | 3         |
| MNCRE48 | 3          | 13             | 21         | 2          | 1         |
| MNCRE07 | 2          | 8              | 13         | 1          | 1         |
| MNCRE22 | 2          | 13             | 26         | 3          | 1         |
| MNCRE35 | 2          | 14             | 20         | 1          | 3         |
| MNCRE30 | 0          | 13             | 16         | 1          | 1         |
| MNCRE28 | 0          | 16             | 19         | 1          | 1         |
| MNCRE29 | 2          | 3              | 7          | 0          | 1         |
| MNCRE52 | 3          | 7              | 12         | 0          | 1         |
| MNCRE57 | 3          | 6              | 12         | 0          | 2         |
| MNCRE71 | 3          | 16             | 27         | 0          | 1         |

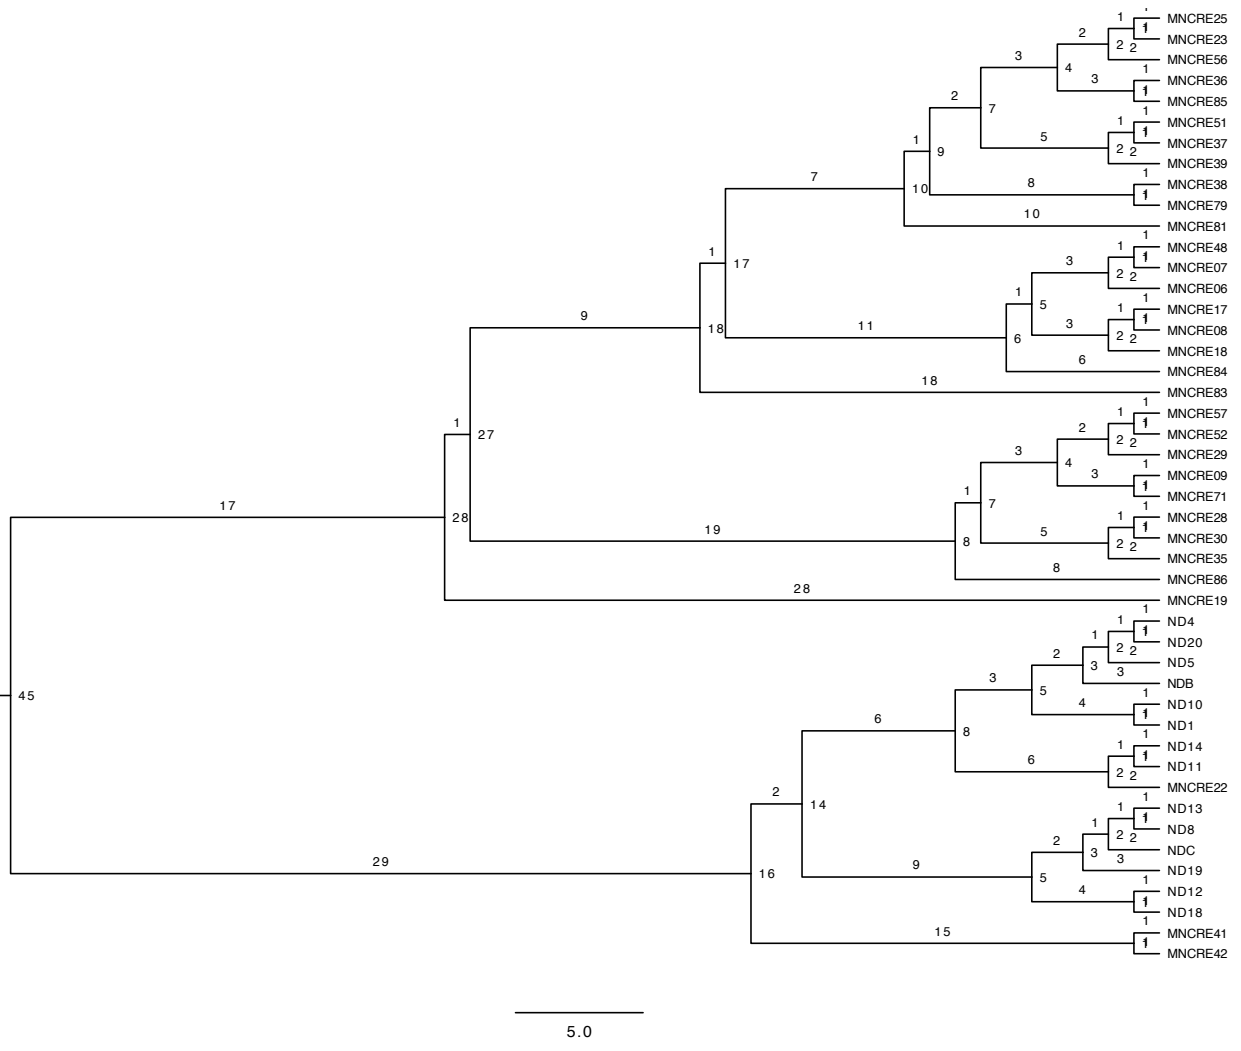

**Supplementary Figure 1.** Reconstruction of the temporal history of the CP-*E. cloacae* circulating lineage using Bayesian coalescent molecular clock analyses.

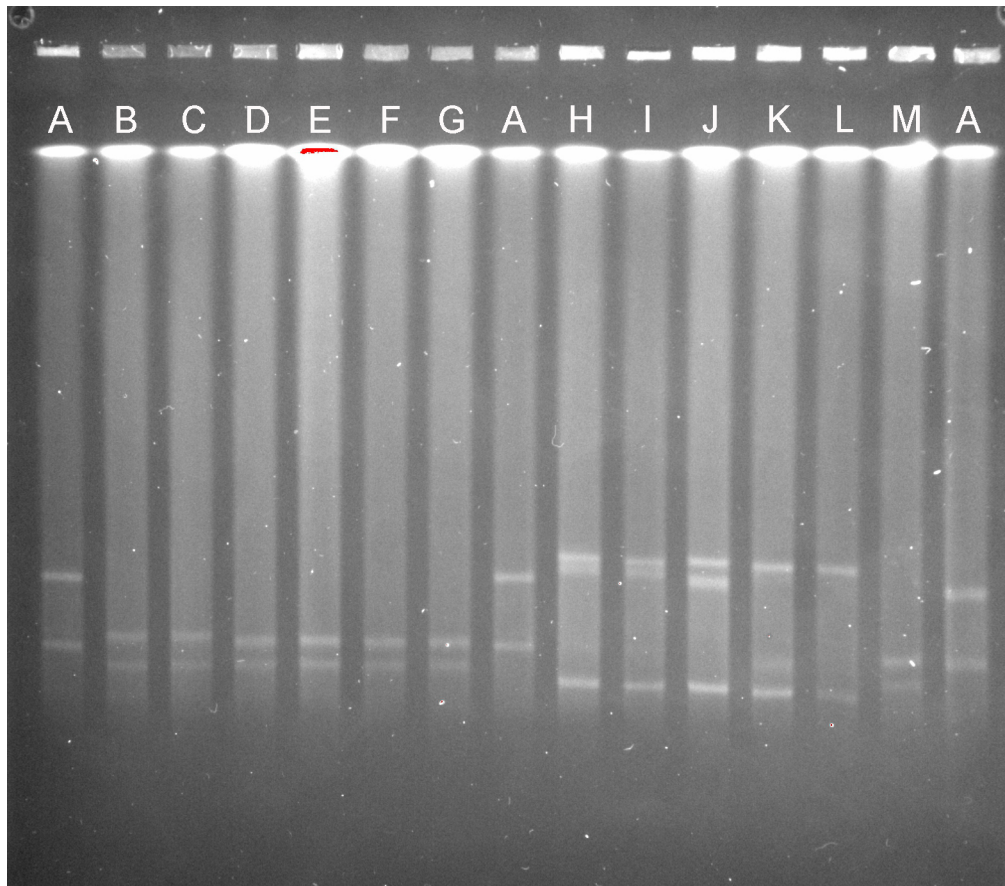

**Supplementary Figure 2.** S1 nuclease pulsed-field gel electrophoresis of selected strains. Lane A = control *E. coli* strain JJ1886 with plasmids of sizes 110 kb and 56 kb; B = MNCRE22 (*E. cloacae*); C = MNCRE22 (*E. cloacae*); D and E = MNCRE41 (*E. cloacae*); F and G = MNCRE42 (*E. cloacae*); H and I = MNCRE44 (*E. coli*); J = MNCRE45 (*E. coli*); K = MNCRE46 (*E. coli*); L = MNCRE47 (*E. coli*); and M = MNCRE51 (*E. cloacae*).

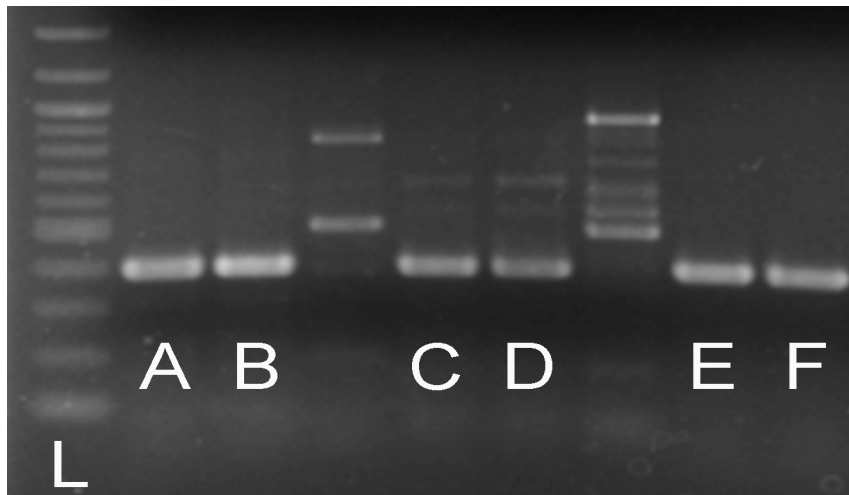

**Supplementary Figure 3.** PCR for junctions spanning individual plasmids (junction 1) and co-integrate plasmid (junctions 2 and 3). Lane A = junction 1 with strain MNCRE41; B = junction 1 with MNCRE51; C = junction 2 with MNCRE44; D = junction 2 with MNCRE46; E = junction 3 with MNCRE44; and F = junction 3 with MNCRE46. L = 100 bp ladder.
